# Supplementary material for: Pressure-driven release of viral genome into a host nucleus is a mechanism leading to herpes infection
Source: eLife journal article supplement (doi:10.7554/elife.47212), 2019-08-08
Supplement: supp [file elife-47212-supp-v1.zip]

Archive with 6 entries (6 files):
- elife_poa_e47212_Figure_6_figure_supplement_1.pdf
- elife_poa_e47212_Figure_2_figure_supplement_1.pdf
- elife_poa_e47212_Transparent_Reporting_File.pdf
- elife_poa_e47212_Supplementary_file_1.xlsx
- elife_poa_e47212_Figure_4_figure_supplement_1.pdf
- elife_poa_e47212_Figure_3_figure_supplement_1.pdf
