# Supplementary material for: Pressure-driven release of viral genome into a host nucleus is a mechanism leading to herpes infection
Source: eLife journal article supplement (doi:10.7554/elife.47212), 2019-08-08
Supplement: supp [file elife-47212-supp-v1.zip › elife_poa_e47212_Supplementary_file_1.xlsx]

## Sheet: Sheet1
					Osmolyte (w/w %)	Fraction a:	Fraction b:	Fraction c:	Fraction d:	Total DNA copy number:	Pull-down efficiency control (fraction b)*:
				HSV-1 primers (genes)	PEG 8kDa	viral DNA from unbound capsids	free viral DNA in the extranuclear solution	non-ejected DNA in bound capsids	ejected intranuclear DNA	(a+b+c+d)	DNA detected after DNase I digestion
				ICP0	0	0.506 ± 0.176	15.093 ± 0.866	4.371 ± 0.332	186.543 ± 99.970	206.51 ± 99.97	0.922 ± 0.068
					30	0.022 ± 0.001	0.005 ± 0.000	560.646 ± 218.366	0.883 ± 0.043	561.56 ± 218.37
				VP16	0	5.982 ± 0.698	57.966 ± 1.800	42.577 ± 8.205	4527.282 ± 3336.223	4633.8 ± 3335.8	8.584 ± 0.816
					30	0.124 ± 0.008	0.187 ± 0.136	5434.512 ± 4161.112	12.336 ± 2.068	5447.2 ± 4161.1
						DNA copy number (×107)
