# Supplementary figures and images for: Pressure-driven release of viral genome into a host nucleus is a mechanism leading to herpes infection
Source: eLife journal article supplement (doi:10.7554/elife.47212), 2019-08-08

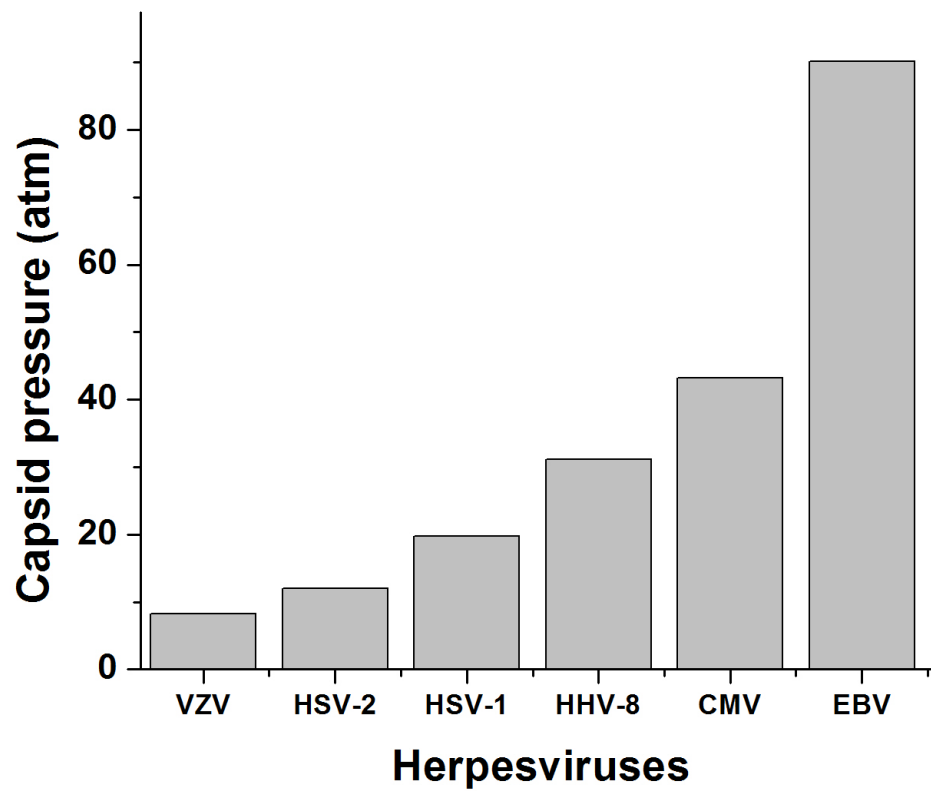

Supplement: supp [file elife-47212-supp-v1.zip › elife_poa_e47212_Figure_6_figure_supplement_1.pdf]

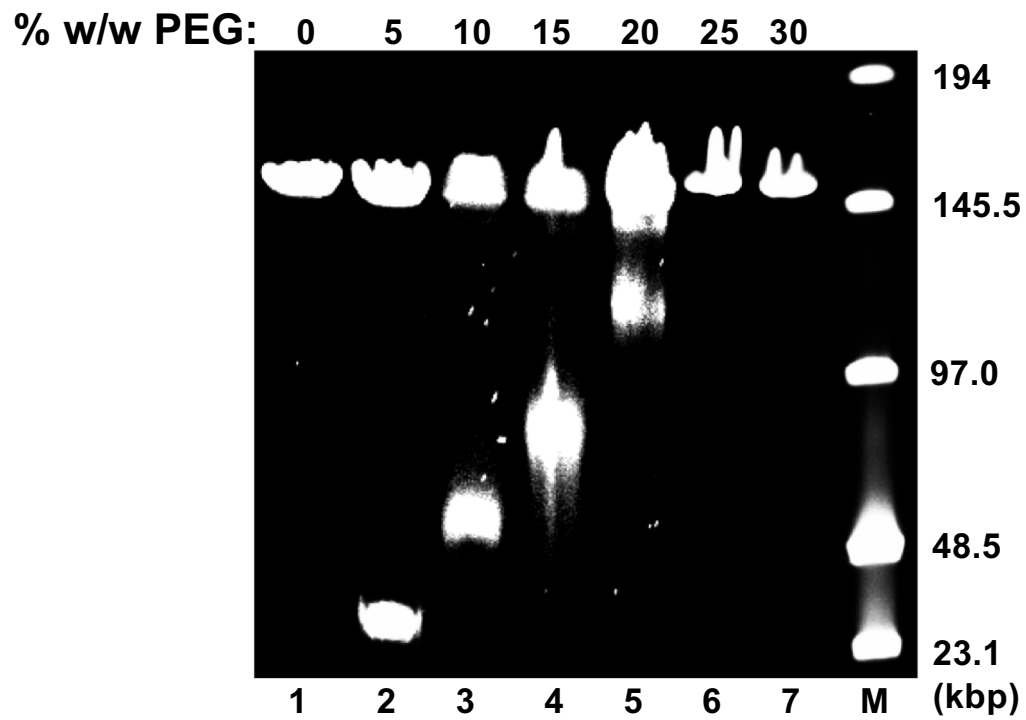

Supplement: supp [file elife-47212-supp-v1.zip › elife_poa_e47212_Figure_2_figure_supplement_1.pdf]

**40 min incubation with  
C-capsids at 37°C**

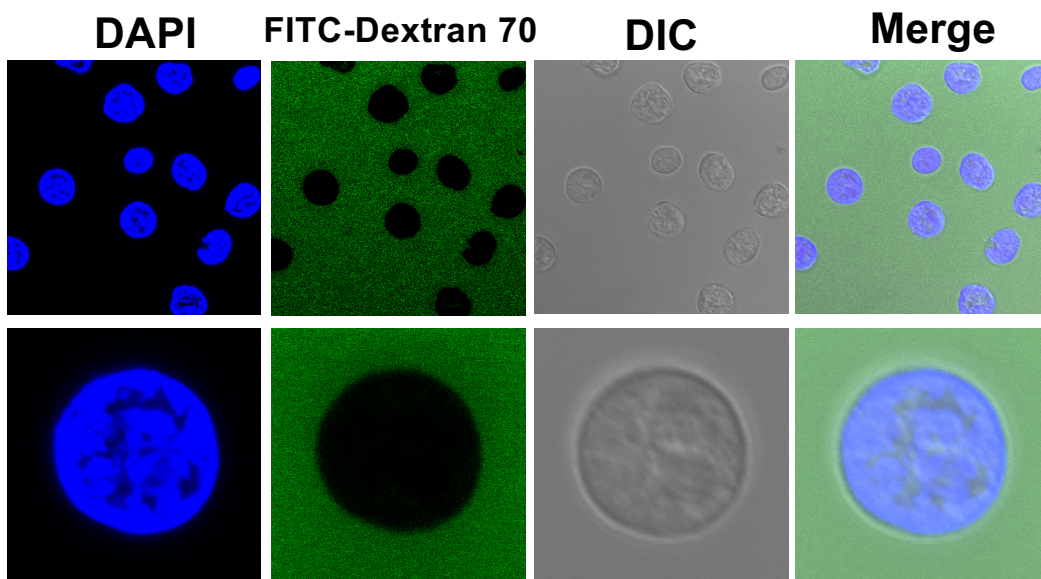

Supplement: supp [file elife-47212-supp-v1.zip › elife_poa_e47212_Figure_4_figure_supplement_1.pdf]

**A**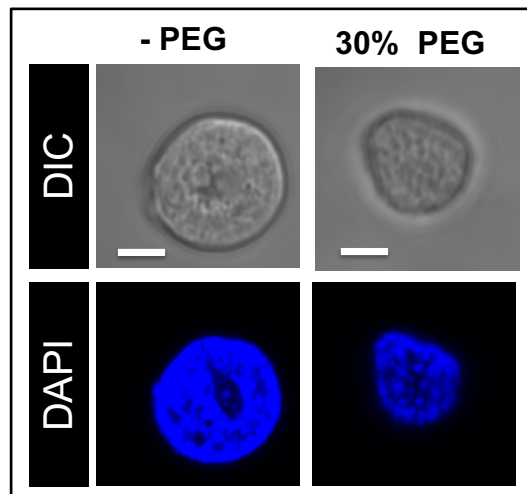**B**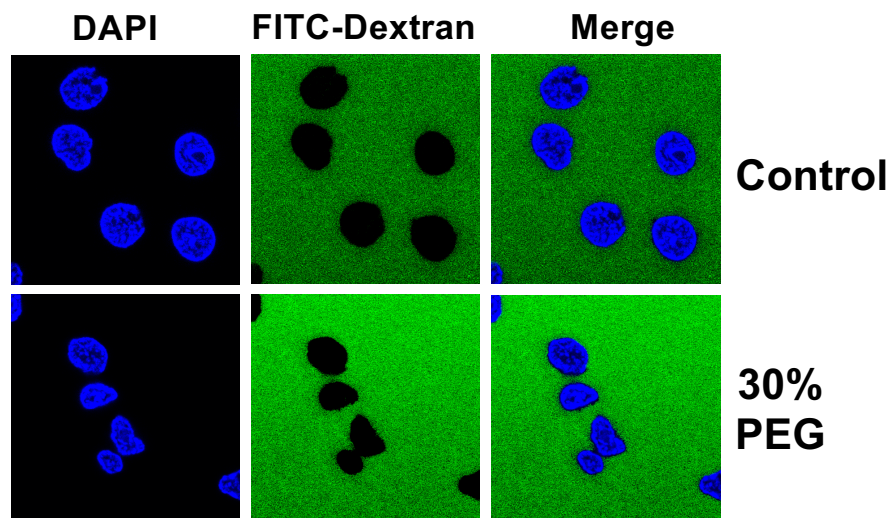

Supplement: supp [file elife-47212-supp-v1.zip › elife_poa_e47212_Figure_3_figure_supplement_1.pdf]
